# Supplementary material for: The Development of High-Performance Platinum-Ruthenium Catalysts for the Methanol Oxidation Reaction: Gram-Scale Synthesis, Composition, Morphology, and Functional Characteristics
Source: MDPI journal article supplement (doi:10.3390/catal12101257), 2022-10-17
Supplement: s1 [file s1]

Supplementary Materials

# The Development of High-Performance Platinum-Ruthenium Catalysts for the Methanol Oxidation Reaction: Gram-Scale Synthesis, Composition, Morphology, and Functional Characteristics

Vladislav Menshikov <sup>1,\*</sup>, Kirill Paperzh <sup>1</sup>, Yulia Bayan <sup>1</sup>, Yegor Beskopylny <sup>1</sup>, Aleksey Nikulin <sup>1</sup>, Ilya Pankov <sup>2</sup> and Sergey Belenov <sup>1,3</sup>

<sup>1</sup> Faculty of Chemistry, Southern Federal University, Str. Zorge 7, 344090 Rostov-on-Don, Russia

<sup>2</sup> Research Institute of Physical Organic Chemistry, Southern Federal University, 194/2 Stachki Str., 344090 Rostov-on-Don, Russia

<sup>3</sup> Prometheus R&D LLC, 4g/36 Zhmaylova Str., 344091 Rostov-on-Don, Russia

\* Correspondence: vmenshikov@sfedu.ru

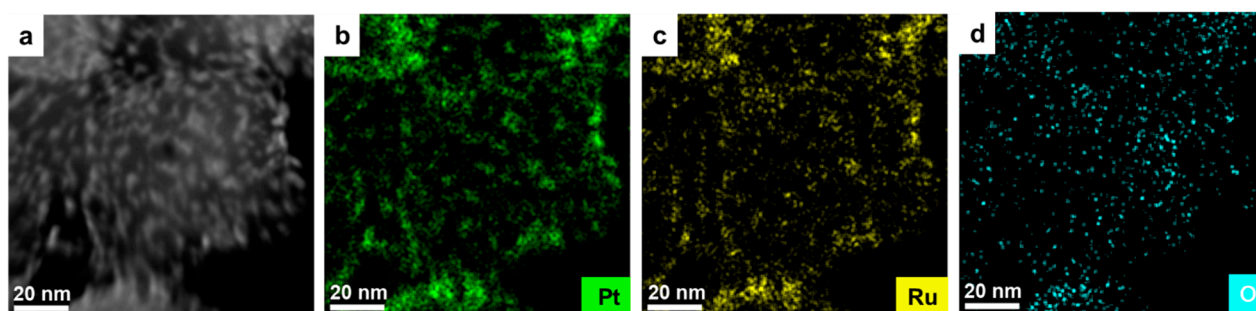

**Figure S1.** The elemental mapping of the surface fragment for the EG sample: the STEM micrograph of the surface (a), the distribution maps of platinum (b), oxygen (c), and ruthenium (d).

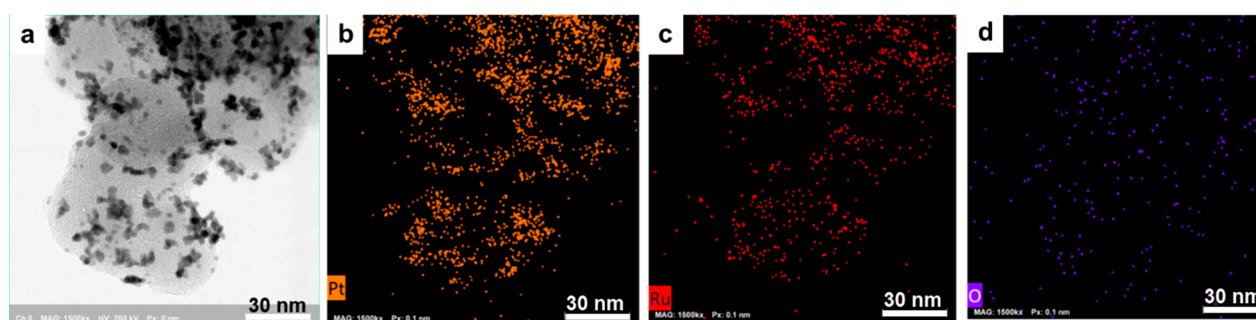

**Figure S2.** The elemental mapping of the surface fragment for the Et-3 sample: the STEM micrograph of the surface (a), the distribution maps of platinum (b), oxygen (c), and ruthenium (d).

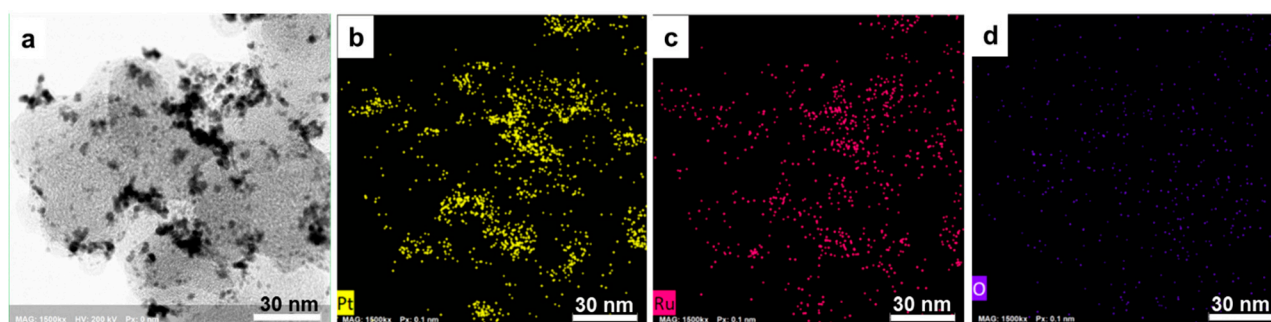

**Figure S3.** The elemental mapping of the surface fragment for the Et-10 sample: the STEM micrograph of the surface (a), the distribution maps of platinum (b), oxygen (c), and ruthenium (d).

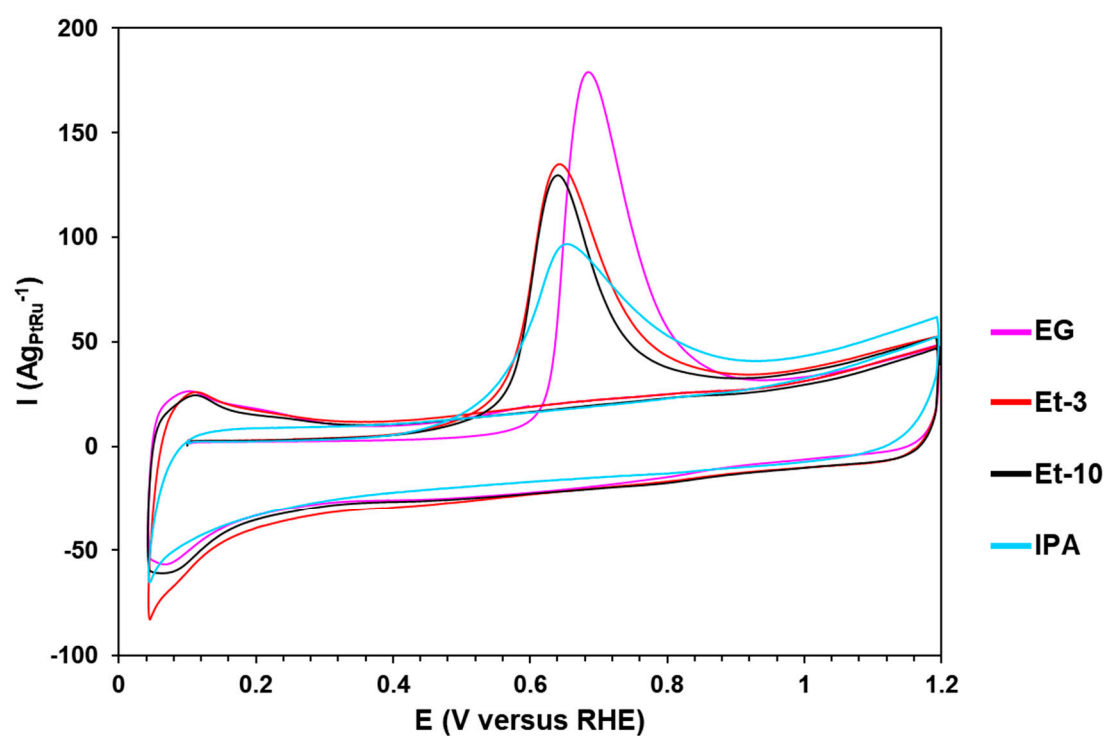

**Figure S4.** CO-stripping, the potential sweep rate is 40 mVs<sup>-1</sup>, the atmosphere of Ar.

**Table S1.** Composition, phase, and structure of the platinum-ruthenium materials.

| Sample   | Metal-Loading, % | Pt-Loading, % | Pt:Ru Atomic Ratio (TXRF) | D <sub>AV</sub> , nm (XRD) |
|----------|------------------|---------------|---------------------------|----------------------------|
| EG-60    | 56.2             | 37.0          | PtRu                      | 1.7                        |
| EG-40    | 39.6             | 27.0          | PtRu <sub>0.9</sub>       | 1.5                        |
| EG-30    | 28.6             | 18.9          | PtRu                      | 1.4                        |
| PtRu-com | 60               | 40            | PtRu                      | 3.1                        |

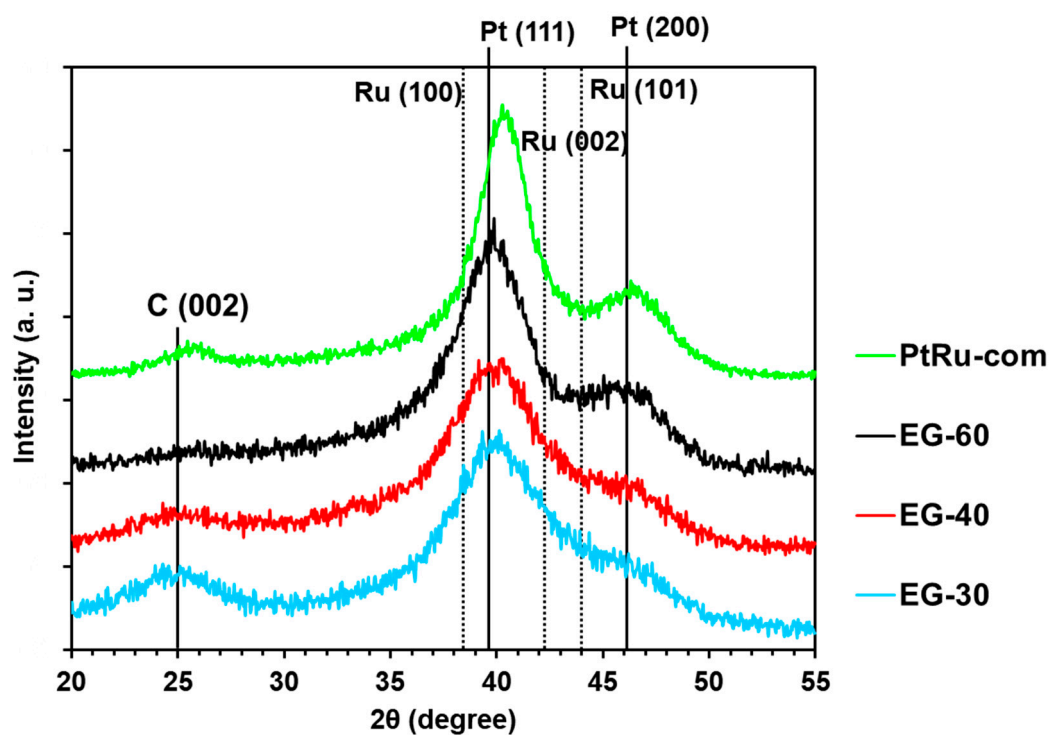

**Figure S5.** X-ray diffraction patterns of the PtRu/C materials obtained by the ethylene glycol, ethanol, and isopropanol synthesis methods.

**Table S2.** Electrochemical characteristics of the platinum-ruthenium materials.

| Sample   | $E_{\text{ONSET}}, \text{V}$<br>(CO) | $E_{\text{PEAK}}, \text{V}$<br>(CO) | $ES_{\text{ACO}},$<br>$\text{m}^2\text{g}_{\text{PtRu}}^{-1}$ | $E_{\text{onset}}, \text{V}$<br>(MOR) | $I_{\text{max}},$<br>$\text{Ag}_{\text{PtRu}}^{-1}$ | $Q_{\text{CH}_3\text{OH}},$<br>$\text{mCg}_{\text{PtRu}}^{-1} *$<br>$10^{-5}$ | $I_{\text{initial}}, \text{Ag}_{\text{PtRu}}^{-1}$ | $I_{\text{final}}, \text{Ag}_{\text{PtRu}}^{-1}$ |
|----------|--------------------------------------|-------------------------------------|---------------------------------------------------------------|---------------------------------------|-----------------------------------------------------|-------------------------------------------------------------------------------|----------------------------------------------------|--------------------------------------------------|
| EG-60    | 0.40                                 | 0.61                                | 82                                                            | 0.39                                  | 668                                                 | 80.0                                                                          | 85                                                 | 39                                               |
| EG-40    | 0.42                                 | 0.64                                | 87                                                            | 0.41                                  | 630                                                 | 68.9                                                                          | 73                                                 | 36                                               |
| EG-30    | 0.47                                 | 0.67                                | 106                                                           | 0.42                                  | 531                                                 | 60.7                                                                          | 74                                                 | 39                                               |
| PtRu-com | 0.41                                 | 0.63                                | 64                                                            | 0.39                                  | 696                                                 | 88.8                                                                          | 88                                                 | 17                                               |

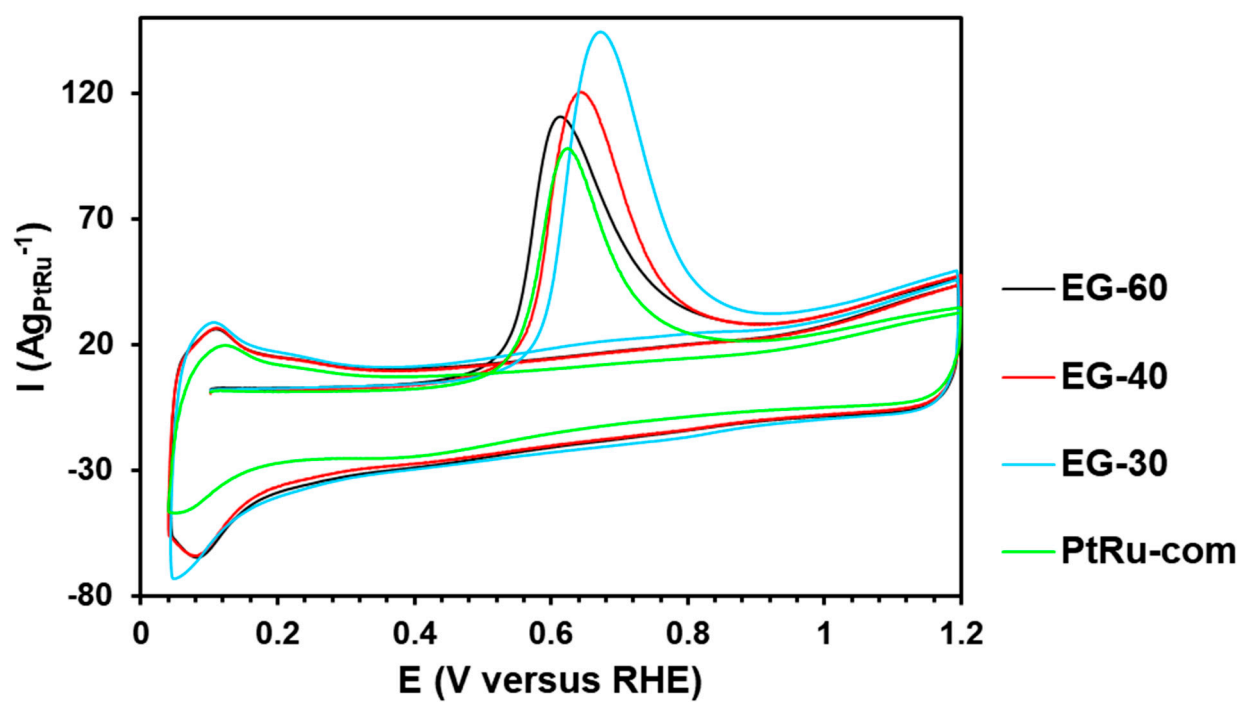

Figure S6. CO-stripping, the potential sweep rate is  $40 \text{ mVs}^{-1}$ , the atmosphere of Ar.
