# Supplementary material for: The Development of High-Performance Platinum-Ruthenium Catalysts for the Methanol Oxidation Reaction: Gram-Scale Synthesis, Composition, Morphology, and Functional Characteristics
Source: MDPI journal article supplement (doi:10.3390/catal12101257), 2022-10-17
Supplement: s1 [file s1]

Archive with 1 entries (1 files):
- catalysts-1971780-supplementary.pdf
